# Supplementary material
Source: publisher figshare collection journal article supplement (https://acs.figshare.com/ndownloader/files/4781980)
Supplement: Supplementary file 1 [file 4781980]

# **SUPPORTING INFORMATION :**

## Reverse Iodine Transfer Polymerization (RITP) of Methyl Methacrylate

*Cyrille Boyer, Patrick Lacroix-Desmazes\*, Jean-Jacques Robin, Bernard Boutevin*

UMR 5076 CNRS-ENSCM, Laboratoire de Chimie Macromoléculaire, Ecole Nationale Supérieure de Chimie de Montpellier, 8 rue de l'Ecole Normale. 34296 Montpellier Cedex 5, France.

[cyrille.boyer@enscm.fr](mailto:cyrille.boyer@enscm.fr), [patrick.lacroix-desmazes@enscm.fr](mailto:patrick.lacroix-desmazes@enscm.fr), [jrobin@univ-montp2.fr](mailto:jrobin@univ-montp2.fr),  
[bernard.boutevin@enscm.fr](mailto:bernard.boutevin@enscm.fr)

Corresponding Author Footnote: UMR 5076 CNRS-ENSCM, Laboratoire de Chimie Macromoléculaire, Ecole Nationale Supérieure de Chimie de Montpellier, 8 rue de l'Ecole Normale. 34296 Montpellier Cedex 5, France. Tel. 33-4-67-14-72-05, fax : 33-4-67-14-72-20.  
[patrick.lacroix-desmazes@enscm.fr](mailto:patrick.lacroix-desmazes@enscm.fr)

**I. Evolution of [A-I] and [A-M<sub>n</sub>-I] versus time, evolution of the iodine functionality of the polymer chains determined by <sup>1</sup>H-NMR spectroscopy during reverse iodine transfer polymerization of methyl methacrylate at 80°C in d<sup>8</sup>-toluene.**

To have a more precise knowledge of what happens during the inhibition period between the different species, the reaction was directly performed in a spectrometer and followed on line by <sup>1</sup>H NMR. It allowed us to determine the evolution of the monomer conversion ( $\alpha$ ) (Equation 1) and the concentration of the A-I adduct (Equation 2) versus time. According to Scheme 2 of the manuscript, A<sup>•</sup> can react with iodine to give A-I, or initiate the polymerization of the monomer to form A-M<sub>n</sub><sup>•</sup> oligoradicals which can also react with iodine to form A-M<sub>n</sub>-I oligomers. It is possible to follow the appearance of these species by <sup>1</sup>H NMR. The various chemical shifts for the AIBN initiator, the recombination product A-A, and the adduct A-I were determined by <sup>1</sup>H NMR (Table 1) and a follow-up of the formation of A-I during RITP was carried out.

The monomer conversion ( $\alpha$ ) *versus* time was calculated by using the values of integration of the vinylic protons (CH<sub>2</sub>=C(CH<sub>3</sub>)CO<sub>2</sub>CH<sub>3</sub>) of methyl methacrylate at 5.30 ppm and at 5.95 ppm (Equation 1). The integral of the methoxy protons -OCH<sub>3</sub> (of monomer and polymer) is used as internal reference because its intensity does not vary versus time.

$$\alpha = 1 - ([MMA]_t/[MMA]_0) = 1 - ((\int^{5.30\&5.95\text{ppm}} CH_2=C/2)/(\int^{3.5\text{ppm}} -OCH_3/3)) \quad (\text{Equation 1})$$

in which [MMA]<sub>t</sub> and [MMA]<sub>0</sub> are the monomer concentrations at a given time *t* and at *t*=0, respectively.

As previously, an inhibition period is observed in agreement with the mechanism proposed in Scheme 2 of the manuscript. Moreover, it appears two stages: a first stage where the

monomer conversion is null and a second stage where there are a low monomer conversion and polymer formation (Figure 2 of the manuscript). The polymer formation is indicated by the change of aspect of the  $-OCH_3$  signals at 3.50 ppm (one signal for the monomer and one signal for the polymer) and the appearance of a new signal towards 1 ppm assigned to the  $-C(CH_3)-$  of the PMMA chains (shift from 1.80 ppm to 1.00 ppm). In parallel, we tried to follow the formation of the A-I adduct by  $^1H$  NMR. The signal of the  $IC(CN)(CH_3)_2$  (Table 1) appears towards 1.97 ppm near the signal of the  $-C(CH_3)-$  of MMA (1.80 ppm). In spite of their proximity, it is possible to follow the evolution of this signal versus time. As previously, the integral of the methoxy protons ( $-OCH_3$ ) (at 3.50 ppm) was taken as internal reference (constant intensity versus time). Thus, it is possible to calculate the concentration of A-I,  $[A-I]_t$ , by using Equation 2.

$$[A-I]_t = [MMA]_0 \times (\int^{1.97\text{ppm}} IC(CN)(CH_3)_2 / 6) / (\int^{3.5\text{ppm}} -OCH_3 / 3) \quad (\text{Equation 2})$$

As in the case of RITP of methyl acrylate<sup>1</sup>, two stages can be distinguished during the inhibition period (Figure 2 of the manuscript): appearance and disappearance of the A-I adduct.

**Table 1.** Assignment of  $^1\text{H}$  NMR peaks for 2,2'-azobisisobutyronitrile (AIBN), iodo-adduct (A-I), and coupling product (A-A) in  $\text{d}^8$  deuterated toluene at  $80^\circ\text{C}$ .

| Structures                                                                                                                                                                                             | Abbreviations | Chemical shifts in ppm (given in $\text{d}^8$ toluene) at $80^\circ\text{C}$ |
|--------------------------------------------------------------------------------------------------------------------------------------------------------------------------------------------------------|---------------|------------------------------------------------------------------------------|
| $  \begin{array}{c}  \text{CH}_3 \quad \text{CH}_3 \\    \quad   \\  \text{CH}_3 - \text{C} = \text{N} = \text{N} - \text{C} - \text{CH}_3 \\    \quad   \\  \text{CN} \quad \text{CN}  \end{array}  $ | AIBN          | 1.46                                                                         |
| $  \begin{array}{c}  \text{CH}_3 \\    \\  \text{CH}_3 - \text{C} - \text{I} \\    \\  \text{CN}  \end{array}  $                                                                                       | A-I           | 1.97                                                                         |
| $  \begin{array}{c}  \text{CH}_3 \quad \text{CH}_3 \\    \quad   \\  \text{CH}_3 - \text{C} - \text{C} - \text{CH}_3 \\    \quad   \\  \text{CN} \quad \text{CN}  \end{array}  $                       | A-A           | 1.13                                                                         |

Figure 1 & Figure 2 below describe the evolution of  $[A-I]_t$  (Equation 2) and  $[A-M_n-I]_t$  (Equation 3) as well as the iodine functionality  $F^{\text{iodine}}$  of the polymer chains (Equation 4) for a RITP experiment.

$$[A-M_n-I]_t = [MMA]_0 \times (\int^{2.80\text{ppm}} -CH_2CI(CH_3)(CO_2CH_3)/2) / (\int^{3.5\text{ppm}} -OCH_3/3) \quad (\text{Equation 3})$$

$$F^{\text{iodine}} = (\int^{2.80\text{ppm}} -CH_2CI(CH_3)(CO_2CH_3)/2) / (\int^{1.2\text{ppm}} -C(CN)(CH_3)_2/6) \quad (\text{Equation 4})$$

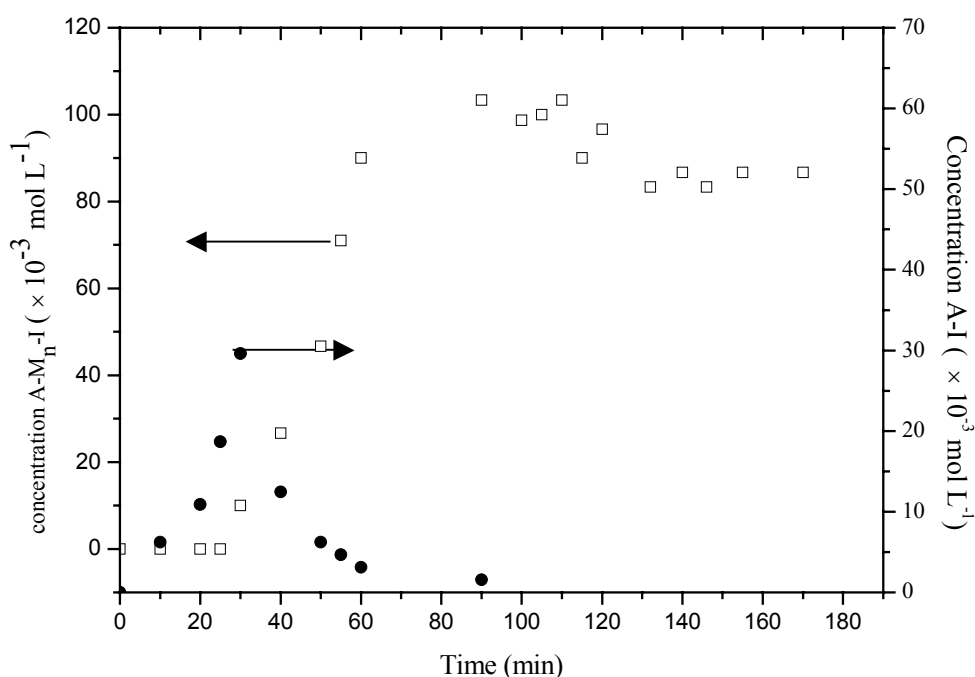

**Figure 1.** Evolution of  $[A-I]_t$  (●) and  $[A-M_n-I]_t$  (□) concentrations determined by  $^1\text{H}$  NMR vs time.

Experimental conditions  $[MMA]/[AIBN]/[I_2] = 100/2.6/1$ : 5.000 g ( $5.00 \times 10^{-2}$  mol) of methyl methacrylate (MMA), 0.213 g ( $1.30 \times 10^{-3}$  mol) of 2,2'-azobisisobutyronitrile (AIBN), 0.128 g ( $5.04 \times 10^{-4}$  mol) of iodine ( $I_2$ ). 0.300 g of this solution was added with 0.20 g of deuterated toluene in the NMR tube.

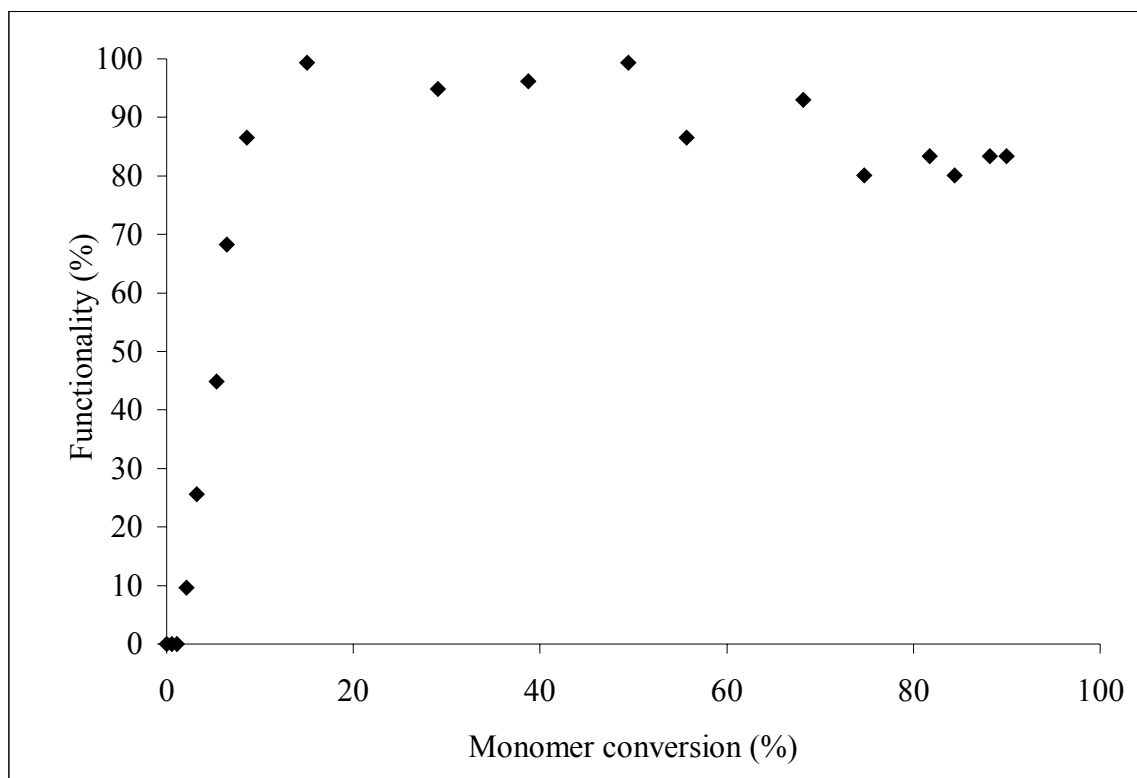

**Figure 2:** Evolution of the iodine functionality  $F^{\text{iodine}}$  of the polymer chains *vs* conversion.

Experimental conditions  $[\text{MMA}]/[\text{AIBN}]/[\text{I}_2] = 100/2.6/1$ : 5.000 g ( $5.00 \times 10^{-2}$  mol) of MMA, 0.213 g ( $1.30 \times 10^{-3}$  mol) of AIBN, 0.128 g ( $5.04 \times 10^{-4}$  mol) of iodine ( $\text{I}_2$ ). 0.300 g of this solution was added with 0.20 g of deuterated toluene in the NMR tube.

II. Evolution of  $\ln([M]_0/[M])$  versus  $(1-\exp(-k_d \times \tau / 2))$  for reverse iodine transfer polymerizations of methyl methacrylate performed with  $[AIBN]=0.25M$  (Figure 3),  $0.20M$  (Figure 4) and  $0.17M$  (Figure 5) at  $80^\circ C$ , and summary of  $k_p/k_{te}^{1/2}$  values (Table 2).

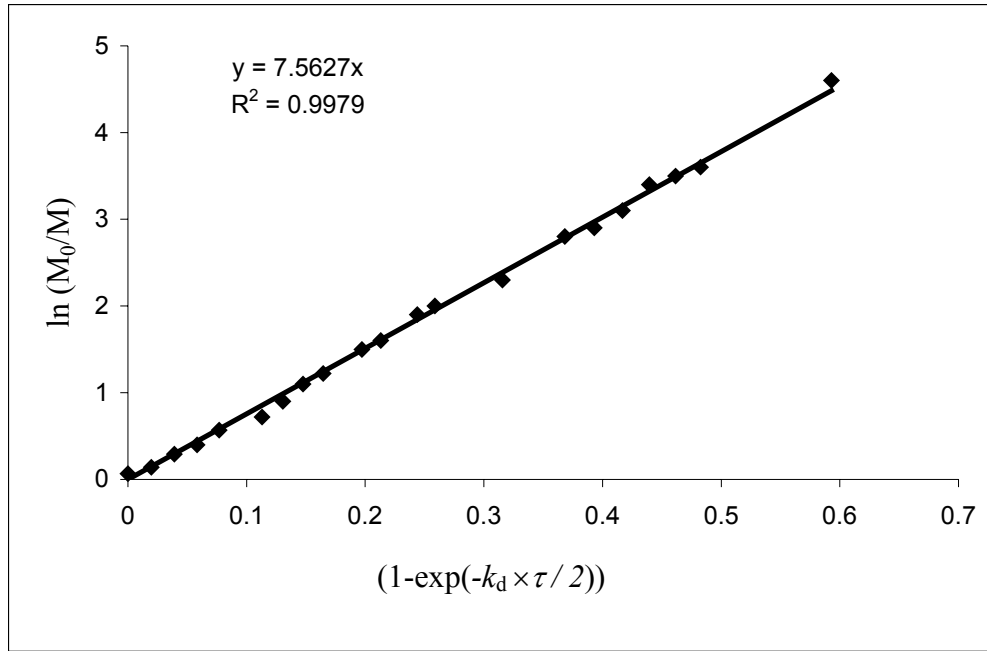

**Figure 3.** Evolution of  $\ln(M_0/M)$  vs  $(1-\exp(-k_d \times \tau / 2))$  for RITP of MMA performed with  $[AIBN] = 0.25 M$  at  $80^\circ C$ .

Experimental conditions  $[MMA]/[AIBN]/[I_2] = 50/2.6/1$ :

25.00 g ( $2.5 \times 10^{-1}$  mol) of MMA, 2.12 g ( $1.29 \times 10^{-2}$  mol) of AIBN, 1.27 g ( $5.0 \times 10^{-3}$  mol) of iodine ( $I_2$ ) and 25 mL of toluene.

Determination of  $k_p/k_{te}^{1/2}$  :

Time inhibition = 75 min.

$[AIBN]_0 = 0.25 M$

$[AIBN]_{t, inh.} = 0.137 M$

$\ln([M]_0/[M]_t) = 2 k_p \times (f \times [AIBN]_{t, inh.})^{1/2} / (k_d \times k_t)^{1/2} \times (1-\exp(-k_d \times \tau / 2))$ ,

with  $k_d = 1.331 \times 10^{-4} s^{-1}$ ,  $f = 0.7$ ,  $\tau = (t - t^{inh})$

Value of  $k_p/k_{te}^{1/2} = 0.141 L^{1/2} mol^{-1/2} s^{-1/2}$

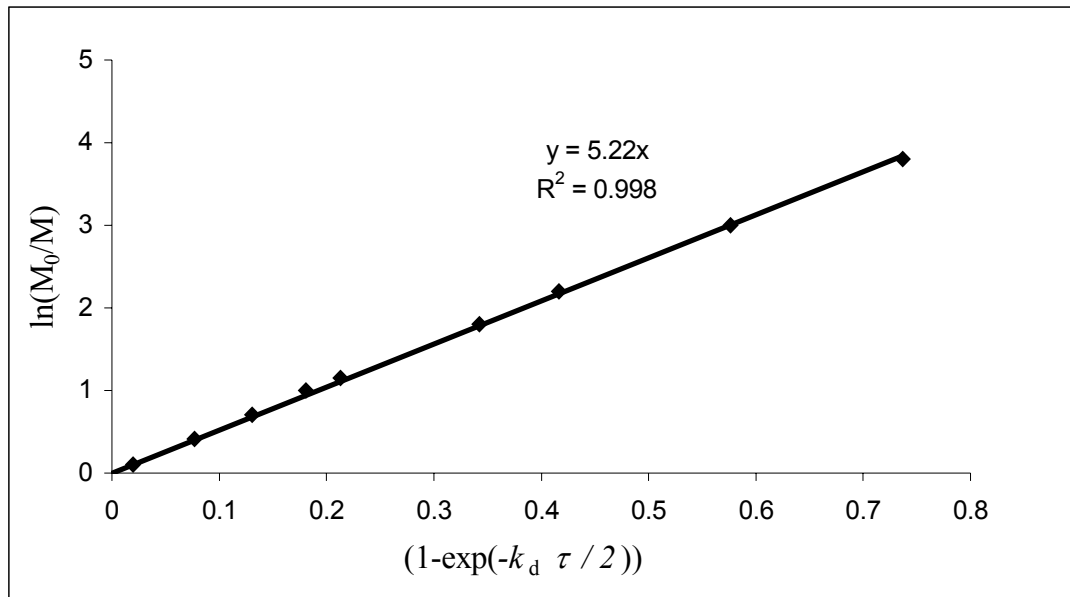

**Figure 4.** Evolution of  $\ln(M_0/M)$  vs  $(1 - \exp(-k_d \times \tau / 2))$  for RITP of MMA performed with  $[AIBN] = 0.20$  M at  $80^\circ\text{C}$ .

Experimental conditions  $[MMA]/[AIBN]/[I_2] = 50/2.0/1$ :

25.00 g ( $2.5 \times 10^{-1}$  mol) of MMA, 1.64 g ( $1.00 \times 10^{-2}$  mol) of AIBN, 1.27 g ( $5.0 \times 10^{-3}$  mol) of iodine ( $I_2$ ) and 25 mL of toluene.

Determination of  $k_p/k_{te}^{1/2}$  :

Time inhibition = 166 min.

$[AIBN]_0 = 0.20$  M

$[AIBN]_{t, \text{inh.}} = 0.05$  M

$\ln([M]_0/[M]_t) = 2 k_p \times (f \times [AIBN]_{t, \text{inh.}})^{1/2} / (k_d \times k_t)^{1/2} \times (1 - \exp(-k_d \times \tau / 2))$ ,

with  $k_d = 1.331 \times 10^{-4} \text{ s}^{-1}$ ,  $f = 0.7$ ,  $\tau = (t - t^{\text{inh}})$

Value of  $k_p/k_{te}^{1/2} = 0.161 \text{ L}^{1/2} \text{ mol}^{-1/2} \text{ s}^{-1/2}$



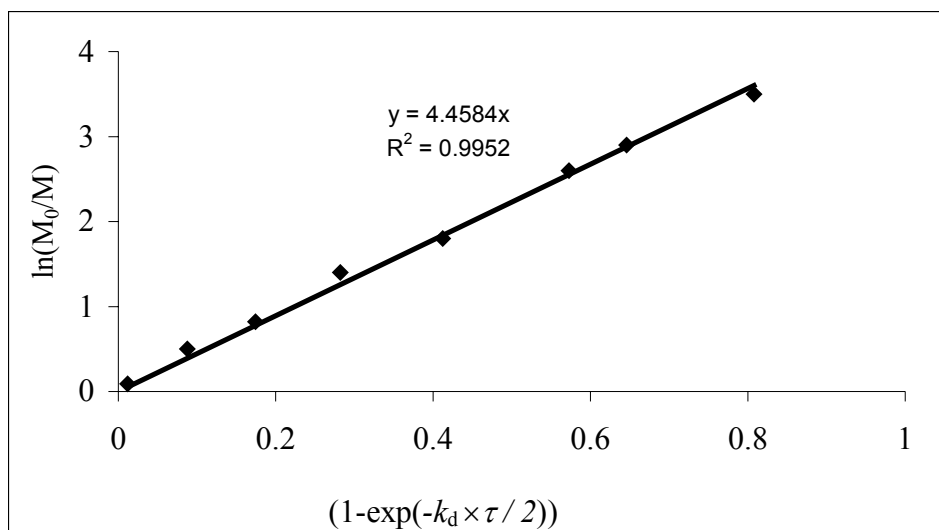

**Figure 5.** Evolution of  $\ln(M_0/M)$  vs  $(1-\exp(-k_d \times \tau / 2))$  for RITP of MMA performed with  $[AIBN] = 0.17$  M at  $80^\circ\text{C}$ .

Experimental conditions  $[MMA]/[AIBN]/[I_2] = 50/1.7/1$ :

25.00 g ( $2.5 \times 10^{-1}$  mol) of MMA, 1.39 g ( $8.50 \times 10^{-3}$  mol) of AIBN, 1.27 g ( $5.0 \times 10^{-3}$  mol) of iodine ( $I_2$ ) and 25 mL of toluene.

Determination of  $k_p/k_{te}^{1/2}$  :

Time inhibition ( $t^{inh}$ ) = 240 min.

$[AIBN]_0 = 0.170$  M

$[AIBN]_{t, inh.} = 0.025$  M

$\ln([M]_0/[M]_t) = 2 k_p \times (f \times [AIBN]_{t, inh})^{1/2} / (k_d \times k_t)^{1/2} \times (1 - \exp(-k_d \times \tau / 2))$ ,  
with  $k_d = 1.331 \times 10^{-4} \text{ s}^{-1}$ ,  $f = 0.7$ ,  $\tau = (t - t^{inh})$

Value of  $k_p/k_{te}^{1/2} = 0.194 \text{ L}^{1/2} \text{ mol}^{-1/2} \text{ s}^{-1/2}$

|                                                                                 |       |       |       |
|---------------------------------------------------------------------------------|-------|-------|-------|
| $[AIBN] \text{ (mol L}^{-1}\text{)}$                                            | 0.25  | 0.20  | 0.17  |
| $k_p/k_{te}^{1/2} \text{ (L}^{1/2} \text{ mol}^{-1/2} \text{ s}^{-1/2}\text{)}$ | 0.141 | 0.161 | 0.194 |

**Table 2.** Summary of values  $k_p/k_{te}^{1/2} \text{ (L}^{1/2} \text{ mol}^{-1/2} \text{ s}^{-1/2}\text{)}$  for RITP of MMA performed at different concentrations of initiator (AIBN) at  $80^\circ\text{C}$ .

III. Characterization of a low molecular weight PMMA-I ( $M_n = 2\,300\text{ g mol}^{-1}$ ,  $M_w/M_n=1.4$ ) by  $^{13}\text{C}$ -NMR (Figure 6), elemental analysis (Equation 5), and assessment of the theoretical iodine functionality  $F^{\text{iodine}}$  (Equation 6).

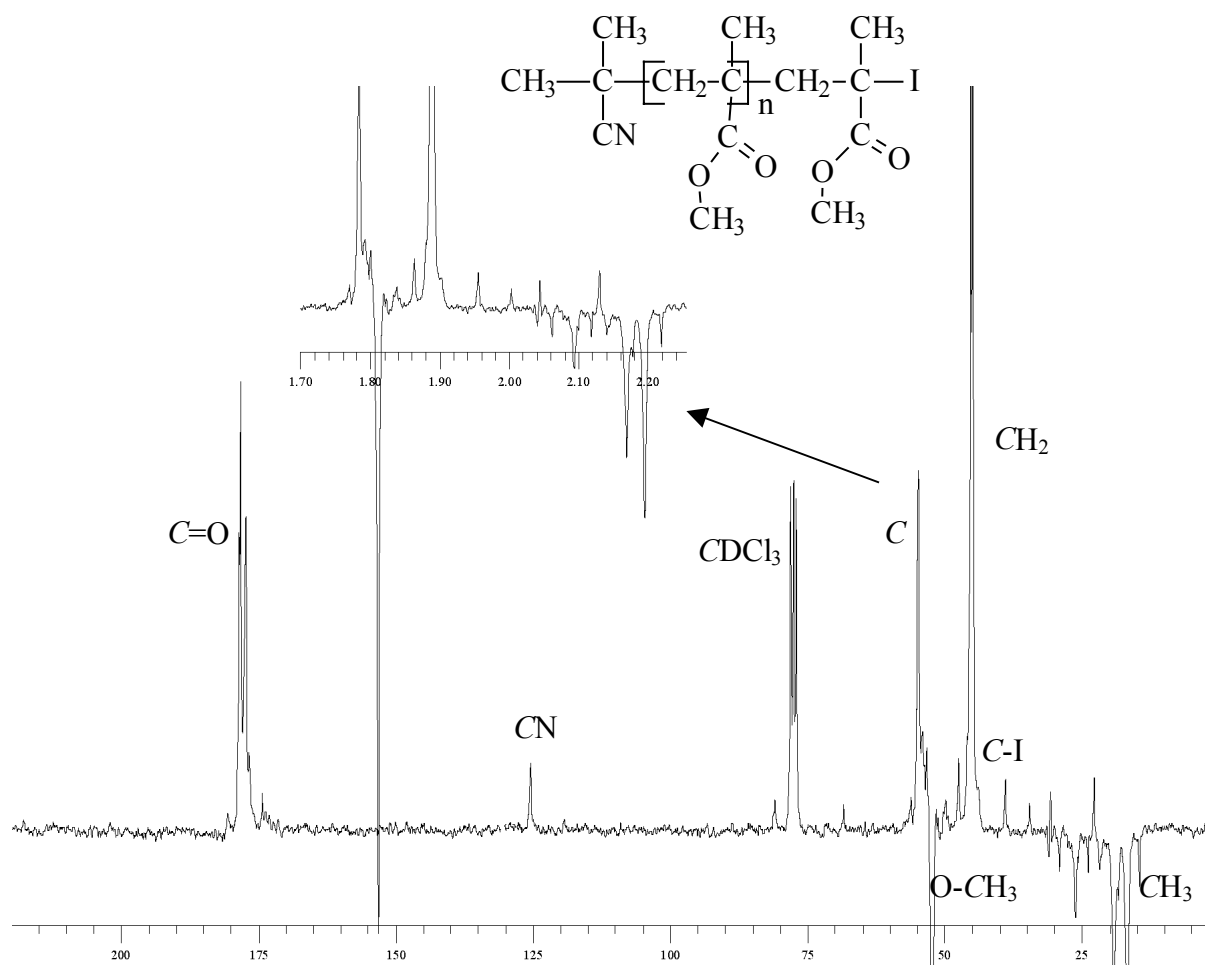

**Figure 6.**  $^{13}\text{C}$  NMR spectrum of a low molecular weight PMMA-I ( $M_n = 2\,300\text{ g mol}^{-1}$ ,  $M_w/M_n = 1.4$ ) in  $\text{CDCl}_3$  (400 MHz).

This polymer ( $M_n = 2\,300\text{ g mol}^{-1}$ ,  $\text{DP}_{n,\text{SEC}} = 21$ ) was also analyzed by elemental analysis and the experimental values of 56.50% carbon, 27.80% oxygen, 7.60% hydrogen, 5.42% iodine, and 0.90% nitrogen, are close to the theoretical values of 57.00% carbon, 29.20% oxygen, 7.60% hydrogen, 5.50% iodine, and 0.60% nitrogen. Iodine can be in three different

forms in the sample: molecular iodine (I<sub>2</sub>), hydriodic acid (HI), or at the polymer chain-end (C-I).

The proportion of free iodine atom (i.e. iodine atom which is not linked to the polymer chains) was determined by two methods:

- (i) volumetric analysis with thiols (titration of iodine I<sub>2</sub>);
- (ii) ionic chromatography in liquid phase (titration of iodine I<sub>2</sub> and hydriodic acid HI).

In the first case, the percentage of free iodine is less than 0.1 wt%, and in the second case, it is around 996 ppm. The negligible quantity of HI in the polymer sample is consistent with the <sup>1</sup>H and <sup>13</sup>C NMR analyses which show the absence of double bond (no elimination of HI). From these results, it is possible to evaluate the iodine functionality  $F^{\text{iodine}}$  (Equation 5).

$$F^{\text{iodine}} = (\text{wt}\%_{\text{iodine, total}} - \text{wt}\%_{\text{iodine, free}}) / (\text{wt}\%_{\text{iodine, theoretical}}) \quad (\text{Equation 5})$$

in which  $\text{wt}\%_{\text{iodine, total}}$  is the total percentage of iodine in the sample,  $\text{wt}\%_{\text{iodine, free}}$  is the percentage of free iodine in the sample (traces of HI and I<sub>2</sub>), and  $\text{wt}\%_{\text{iodine, theoretical}}$  is the theoretical percentage of iodine in the sample, calculated by  $\text{wt}\%_{\text{iodine, theoretical}} = M^{\text{iodine atom}} \times 100 / M_n$ , in which  $M^{\text{iodine atom}} = 127 \text{ g mol}^{-1}$  and  $M_n$  is the mean number average molecular weight of the sample.

The experimental values of  $F^{\text{iodine}}$  should be compared to the theoretical iodine functionality,  $F^{\text{iodine}}(\text{theoretical})$ , given by equation 6.

$$F^{\text{iodine}}(\text{theoretical}) = 2 \times [\text{I}_2]_0 / (2 \times [\text{I}_2]_0 + 2f \times \Delta \text{AIBN}) \quad (\text{Equation 6})$$

in which  $\Delta \text{AIBN}$  is the excess amount of AIBN used to initiate and propagate the polymerization during the polymerization period ( $\tau_{\text{polym.}}$ ) (after the inhibition period).

The value of  $\Delta\text{AIBN}$  is evaluated by  $\Delta\text{AIBN} = [\text{AIBN}]_{t, \text{inh}} \times (1 - \exp(-k_d \times \tau_{\text{polym}}))$ , with  $\tau = (t - t^{\text{inh}})$ . As an example, for the sample of  $M_n = 2\,300 \text{ g mol}^{-1}$  (monomer conversion  $\approx 70\%$ ) synthesized with  $[\text{AIBN}]_0/[\text{I}_2]_0 = 1.7$  and  $[\text{I}_2]_0 = 0.074 \text{ mol L}^{-1}$ , the inhibition time is  $t^{\text{inh}} = 240 \text{ min}$  ( $[\text{AIBN}]_{t, \text{inh}} = 0.018 \text{ mol L}^{-1}$ , with  $k_d = 1.331 \times 10^{-4} \text{ s}^{-1}$  at  $80^\circ\text{C}$  for  $\text{AIBN}^2$ ), and the polymerization time is  $\tau_{\text{polym}} = 60 \text{ min}$  ( $\Delta\text{AIBN} = 0.007 \text{ mol L}^{-1}$ ) leading to the theoretical iodine functionality  $F^{\text{iodine}} = 94\%$ . The experimental values of  $F^{\text{iodine}}$  (about 95%) determined by the different methods ( $^1\text{H}$  NMR,  $^{13}\text{C}$  NMR, and elemental analysis) are in good agreement with the calculated theoretical value (94%) (Table 3 of the manuscript).

**IV. Characterization of a low molecular weight PMMA-I ( $M_n = 2\,300\text{ g mol}^{-1}$ ,  $M_w/M_n = 1.4$ ) by MALDI-TOF (Figure 7) (Table 3).**

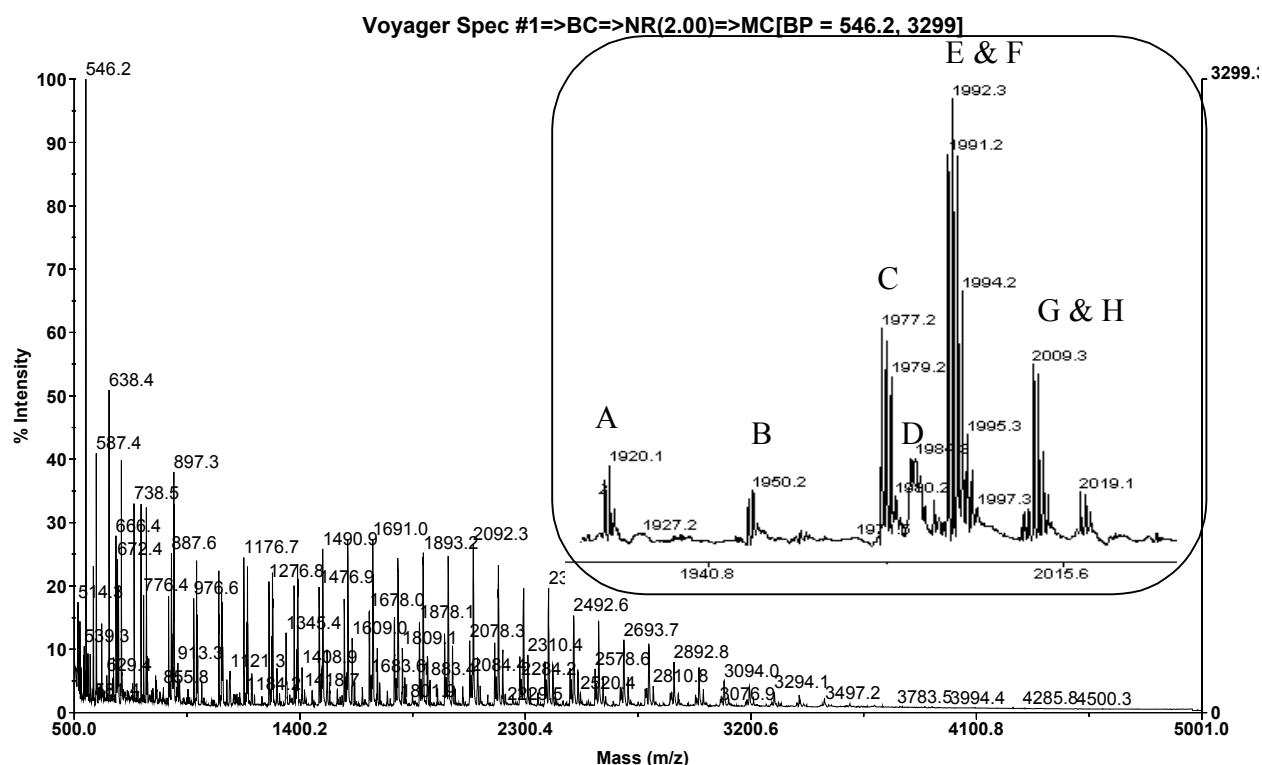

**Figure 7.** Mass-assisted laser desorption ionization time-of-flight (MALDI-TOF) analysis of a low molecular weight poly(methyl methacrylate) prepared by Reverse Iodine Transfer Polymerization of methyl methacrylate (MMA) at 80°C in toluene initiated by 2,2'-azobisbutyronitrile (AIBN) in the presence of iodine ( $I_2$ ) with  $[MMA]/[AIBN]/[I_2] = 60/1.7/1$  (monomer conversion = 70%,  $M_n = 2\,300\text{ g mol}^{-1}$ ,  $M_w/M_n = 1.4$ ) (Inset is an expanded spectrum showing several polymer series).

The chromatogram (Figure 7) shows a series of peaks separated by  $m/z=100$  (corresponding to the molecular weight of the MMA monomer unit). By focusing on the zone from  $m/z = 1915$  to  $2030$ , eight different series (A, B, C, D, E, F, G, H) are distinguished and the possible corresponding structures are given in Table 3.

The expected A-M<sub>n</sub>-I structure appears at  $m/z = 1919.01$  with a weak intensity (Table 3, series A).

The distribution at  $m/z = 1977.23$  can be ascribed to the elimination of CH<sub>3</sub>I from the A-M<sub>n</sub>-I polymer chains (lactone formation, Scheme 3 of the manuscript) (Table 3, series C). This loss of CH<sub>3</sub>I can be achieved at high temperature (150 °C) or during MALDI-TOF analysis. This is consistent with various studies reported in the literature (polymers of PMMA terminated by a bromine atom<sup>3</sup> or by a chlorine atom<sup>4-6</sup>).

The distribution at  $m/z = 1991.24$  can be attributed to the vinyl terminated PMMA chains (Table 3, series E) (note: the distribution at  $m/z = 2008.23$  corresponds to the same structure cationized with K<sup>+</sup>, Table 3, series G). These unsaturated chains might arise from termination by disproportionation (Scheme 1). The corresponding saturated polymer chains (A-M<sub>n</sub>-H structure, cationized with Na<sup>+</sup>) would correspond to the signal at  $m/z=1993.25$  (Table 5, series F) (the distribution at  $m/z=2009.25$  corresponds to the same structure cationized with K<sup>+</sup>, Table 3, series H). However, since no double bond is detected by <sup>1</sup>H and <sup>13</sup>C NMR, it is thought that the distribution at  $m/z = 1991.24$  mainly comes from the elimination of HI from A-M<sub>n</sub>-I polymer chains during the MALDI-TOF analysis (Scheme 3 of the manuscript). In the literature, this case was already observed for methacrylate or acrylate oligomers terminated by chlorine or bromine atoms<sup>5,7</sup>. Nonaka et al.<sup>7</sup> showed that this reaction of elimination of HCl for the PMMA-Cl is carried out during the laser irradiation. According to the power of the laser, the deshydrohalogenation is more or less significant.



**Table 3.** Tentative assignment of peaks in the MALDI-TOF spectrum of a poly(methyl methacrylate) sample ( $M_n = 2\,300\text{ g mol}^{-1}$ ,  $M_w/M_n = 1.4$ ) synthesized by Reverse Iodine Transfer Polymerization.

| Series | $m/z$        |                                     | $n$ | Structures                                                                                                                                                                                                               |
|--------|--------------|-------------------------------------|-----|--------------------------------------------------------------------------------------------------------------------------------------------------------------------------------------------------------------------------|
|        | experimental | theoretical<br>monoisotopic<br>mass |     |                                                                                                                                                                                                                          |
| A      | 1 919.01     | 1 918.83                            | 17  | $\text{CH}_3-\text{C}(\text{CH}_3)(\text{CN})-\left[\text{CH}_2-\text{C}(\text{CH}_3)(\text{COOCH}_3)\right]_n-\text{I}, \text{Na}^+$                                                                                    |
| B      | 1949.23      | -                                   | -   | Not attributed                                                                                                                                                                                                           |
| C      | 1 977.23     | 1 977.01                            | 19  | $\text{CH}_3-\text{C}(\text{CH}_3)(\text{CN})-\left[\text{CH}_2-\text{C}(\text{CH}_3)(\text{COOCH}_3)\right]_{n-2}-\text{CH}_2-\text{C}(\text{CH}_3)(\text{COOCH}_3)-\text{C}(\text{CH}_3)(\text{COOCH}_3), \text{Na}^+$ |
| D      | 1 983.47     | -                                   | -   | Not attributed                                                                                                                                                                                                           |
| E      | 1 991.24     | 1 991.02                            | 19  | $\text{CH}_3-\text{C}(\text{CH}_3)(\text{CN})-\left[\text{CH}_2-\text{C}(\text{CH}_3)(\text{COOCH}_3)\right]_{n-1}-\text{CH}_2-\text{C}(\text{CH}_3)(\text{COOCH}_3), \text{Na}^+$                                       |
| F      | 1 993.25     | 1 993.04                            | 19  | $\text{CH}_3-\text{C}(\text{CH}_3)(\text{CN})-\left[\text{CH}_2-\text{C}(\text{CH}_3)(\text{COOCH}_3)\right]_n-\text{H}, \text{Na}^+$                                                                                    |
| G      | 2 008.23     | 2 007.00                            | 19  | Idem series E, cationized $\text{K}^+$                                                                                                                                                                                   |
| H      | 2 009.25     | 2 009.01                            | 19  | Idem series F, cationized $\text{K}^+$                                                                                                                                                                                   |



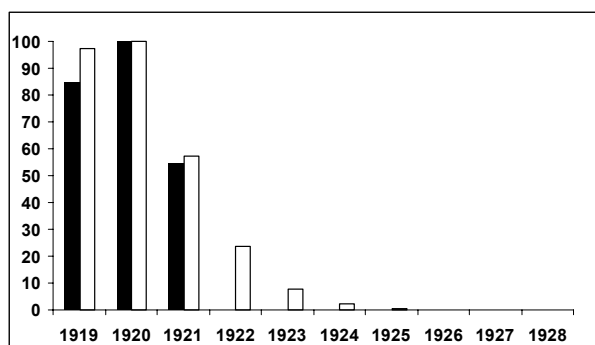

a- PMMA-I ( $n=17$ ) (series A).

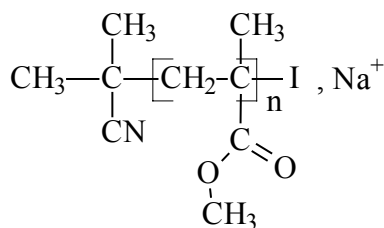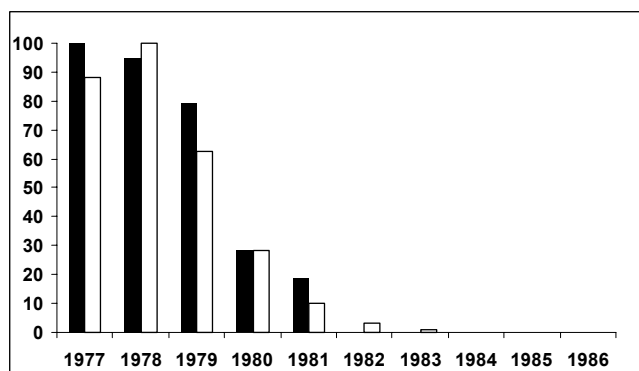

b-  $\text{CH}_3\text{I}$  elimination ( $n=19$ ) (series B).

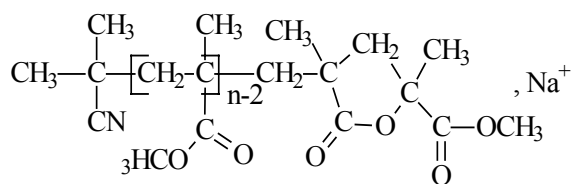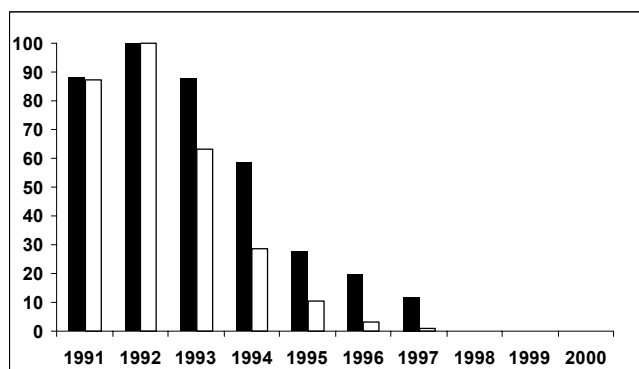

c- HI elimination or dismutation ( $n=19$ ) (series E).

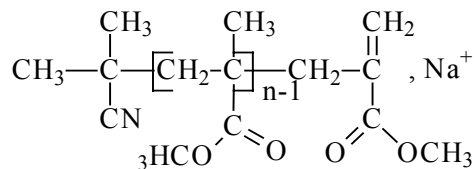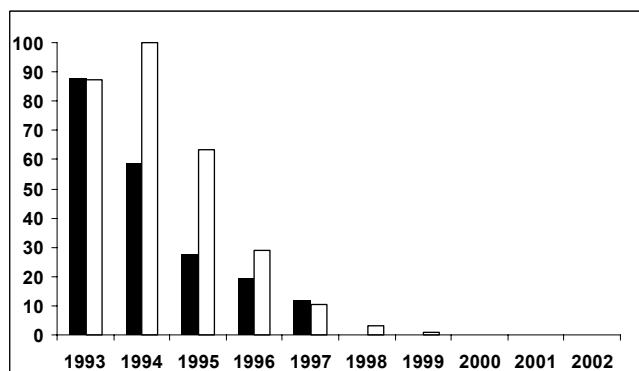

d- Transfer reaction to solvent or dismutation (PMMA-H) ( $n=19$ ) (series F).

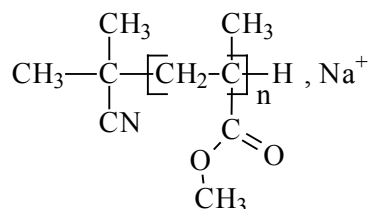

**Figure 8.** Simulated (white) and experimental (black) MALDI-TOF distributions for various possible structures.

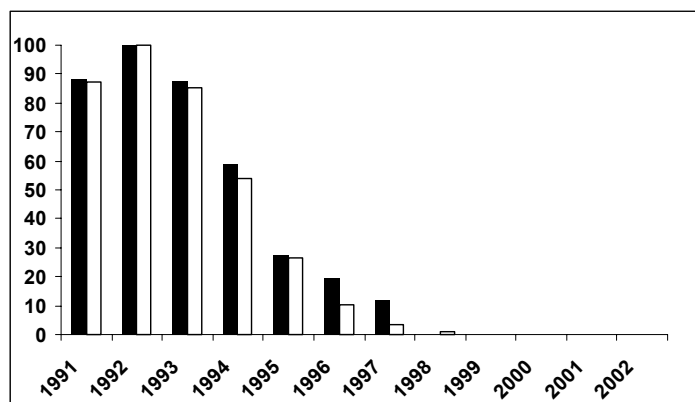

Linear combination of Series E & F (80/20)

**Figure 9.** Simulated (white) and experimental (black) MALDI-TOF distributions for a linear combination of Series E & F (80/20).

## REFERENCES:

- (1) Lacroix-Desmazes, P.; Severac, R.; Boutevin, B. *Macromolecules* **2005**, *38*, 6299-6309.
- (2) Van Hook, J. P.; Tobolsky, A. V. *J. Am. Chem. Soc.* **1958**, *80*, 779-782.
- (3) McEwen, C. N.; Peacock, P. M.; Guan, Z. In *Proceeding of the 45th ASMS conference on Mass Spectrometry and Allied Topics*, 1997, June 1-5; p 409.
- (4) Jackson, A. T.; Yates, H. T.; Scrivens, J. H.; R., G. M.; H., B. R. *J. Am. Soc. Mass Spectrom* **1997**, *8*, 1206-1213.
- (5) Coca, S.; Jasieczek, C. B.; Beers, K. L.; Matyjaszewski, K. *J. Polym. Sci. Part A; Polym. Chem.* **1998**, *36*, 1417-1424.
- (6) Borman, C. D.; Jackson, A. T.; Bunn, A.; Cutter, A. L.; Irvine, D. J. *Polymer* **2000**, *41*, 6015-6020.
- (7) Nonaka, H.; Ouchi, M.; Kamingaito, M.; Sawamoto, M. *Macromolecules* **2001**, *34*, 2083-2088.
